# Supplementary material for: Steric effects in hydrogen bonded columns of salts of benzoic acid and 1-adamantanecarboxylic acid with the cyclic amines CnH2n+1NH2, n = 5, 6, 7, 8 and 12
Source: Royal Society of Chemistry journal article supplement (doi:10.1039/c0ce00749h), 2011-01-01

## PXRD Traces for salts **1-10**

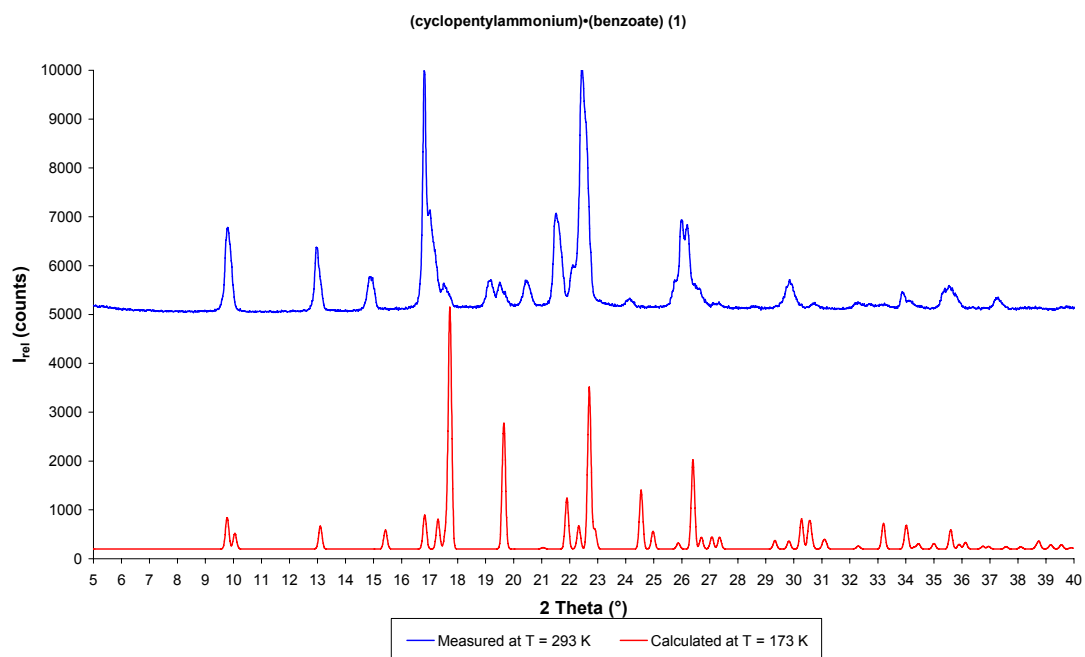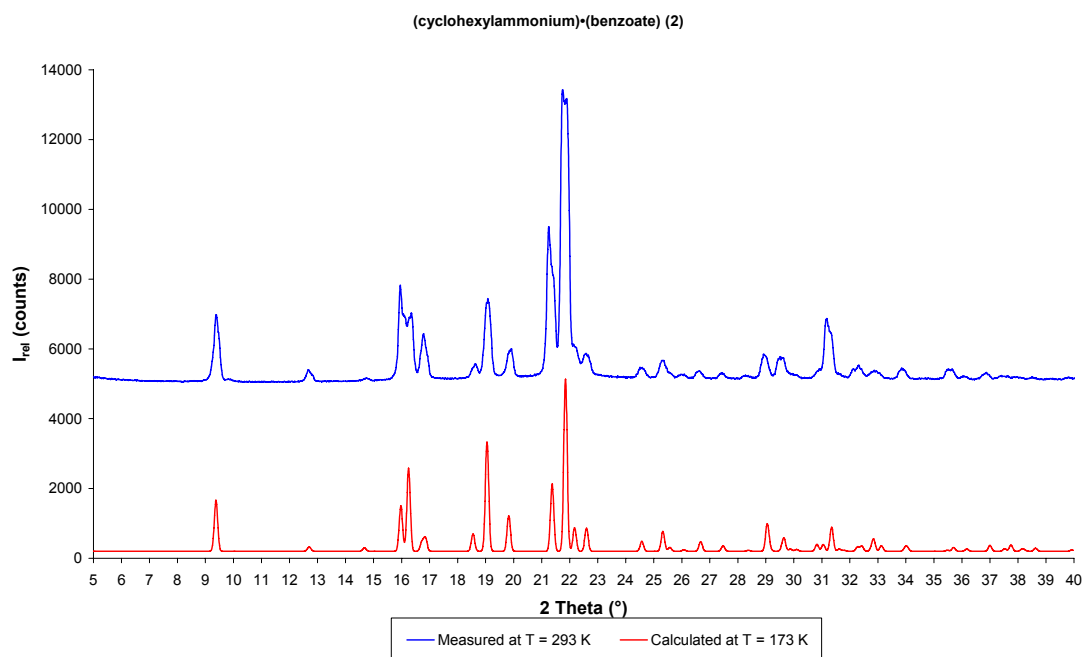

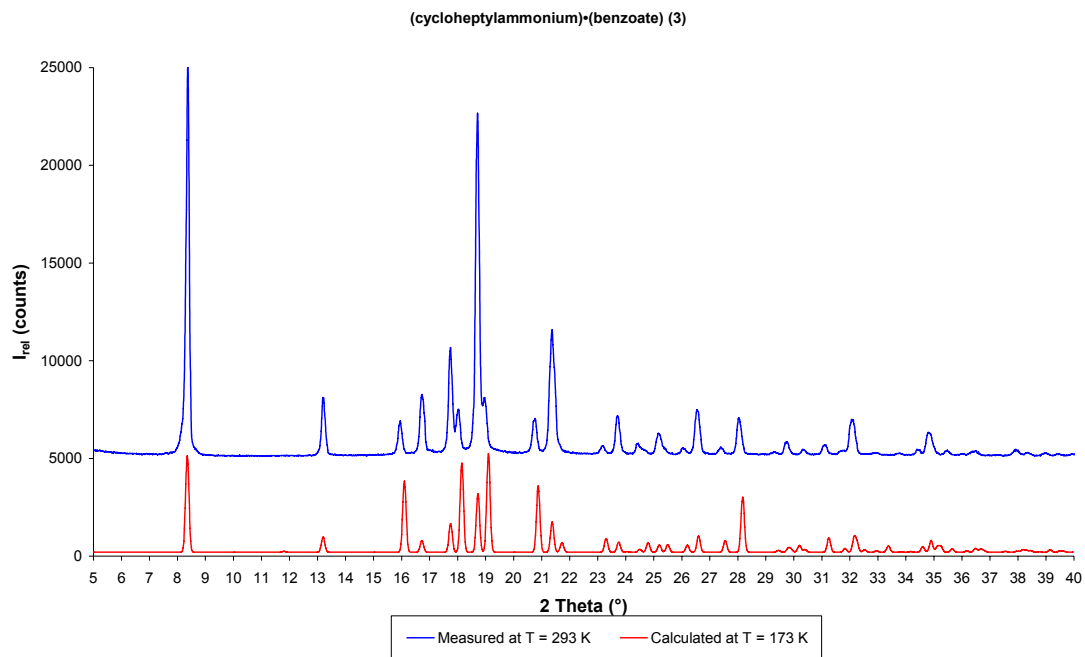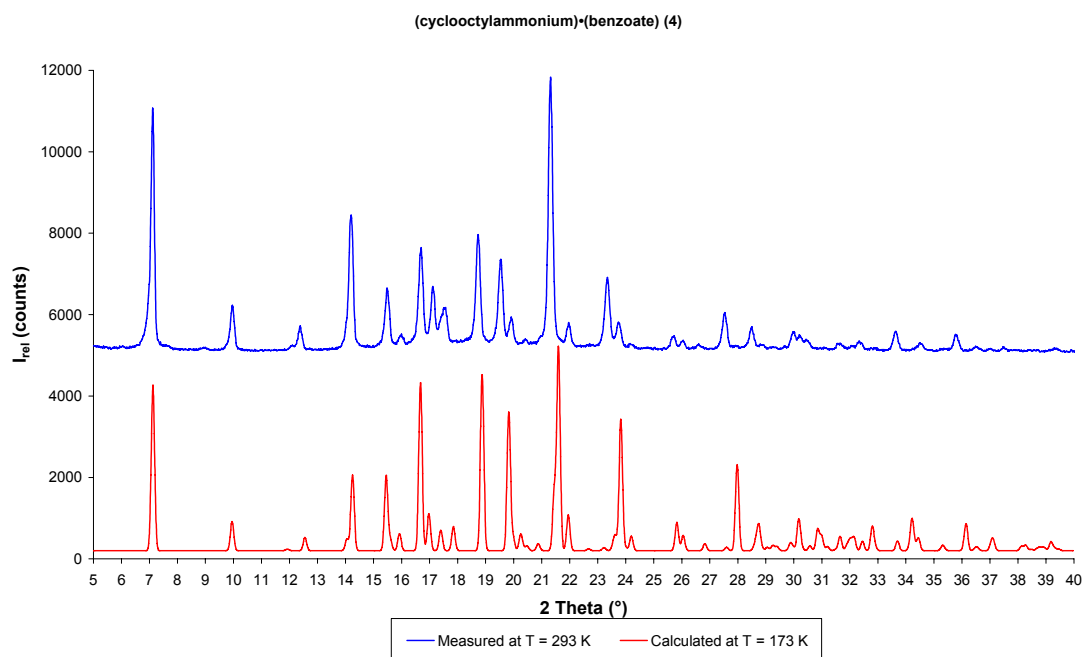

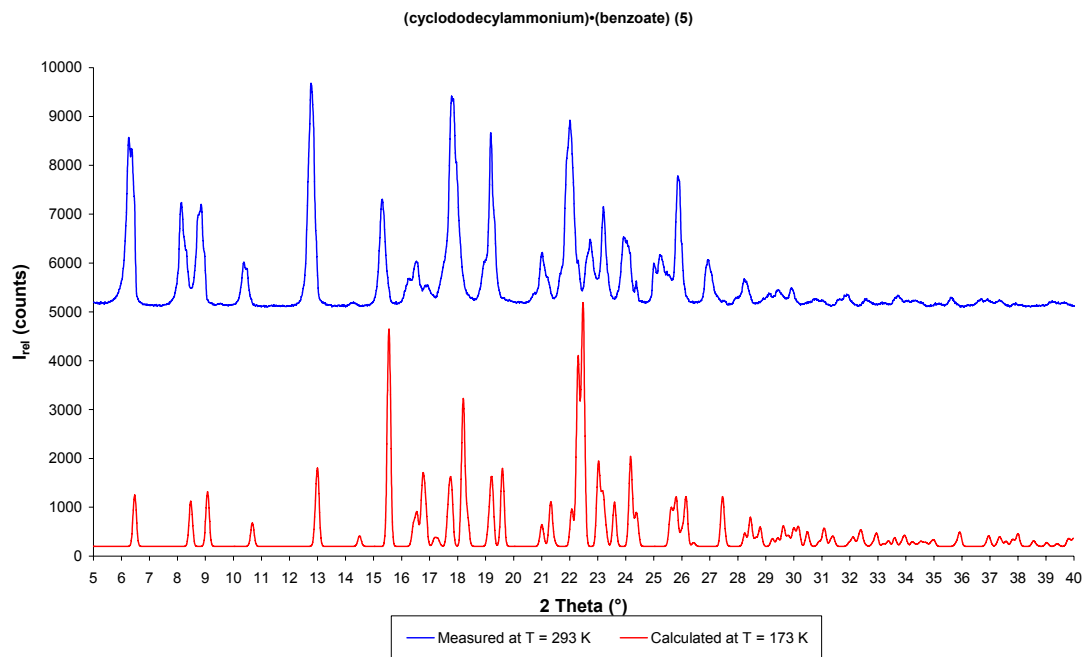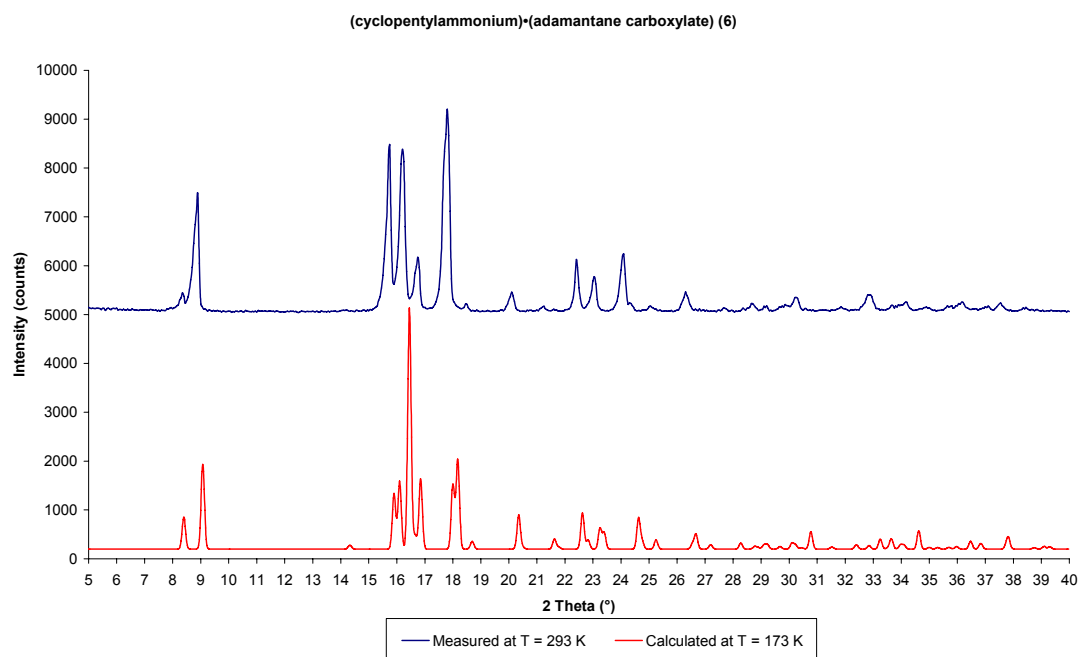

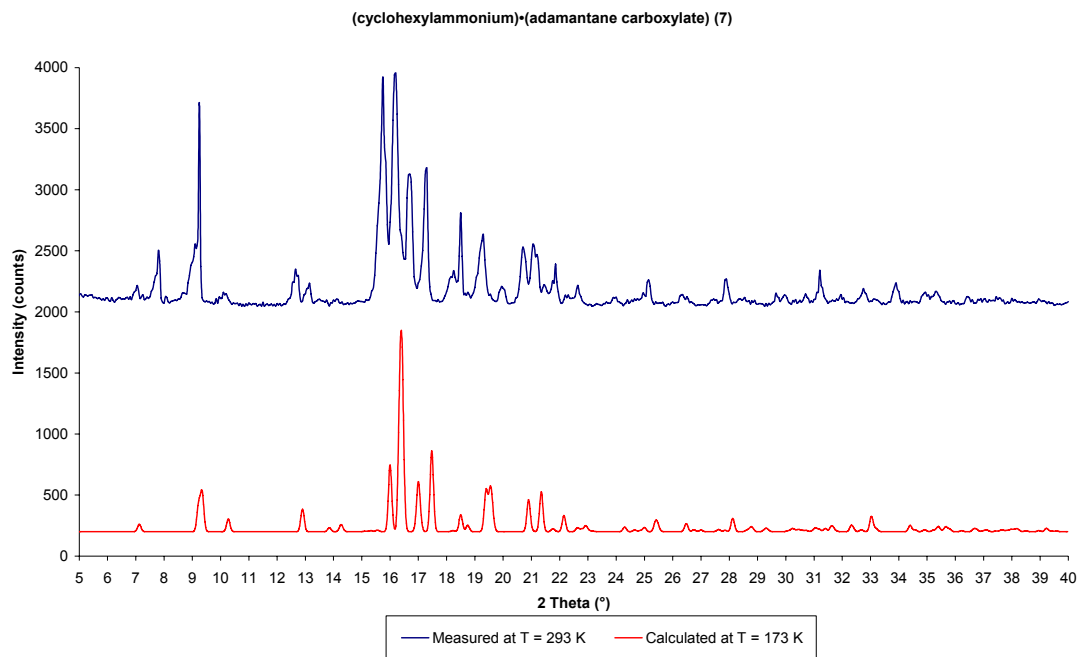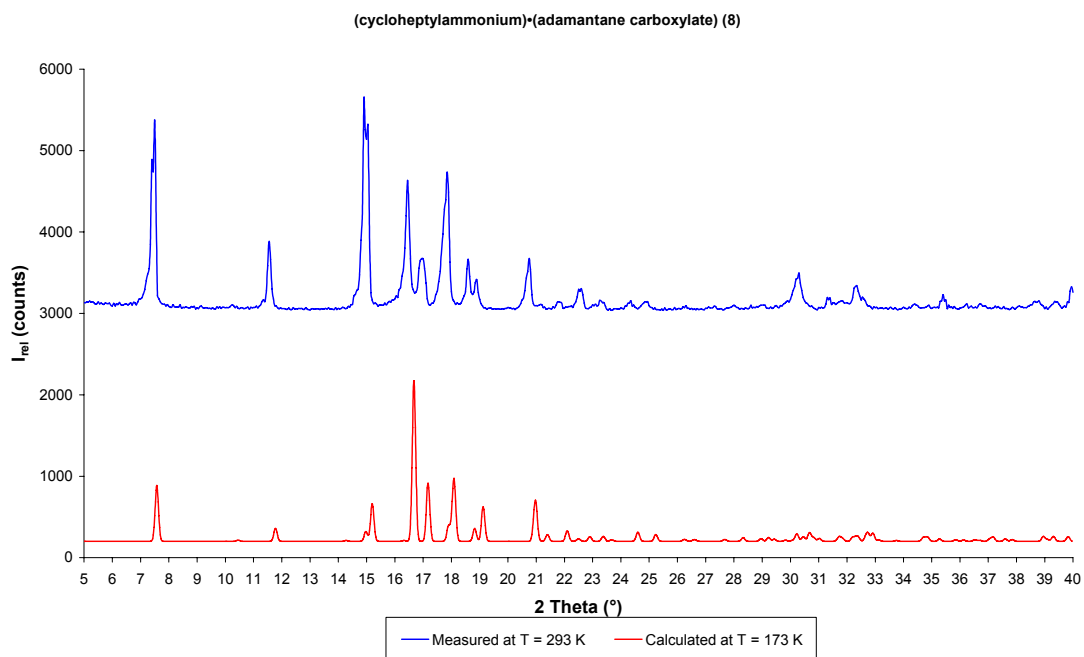

(cyclododecylammonium)-(adamantane carboxylate) (10)

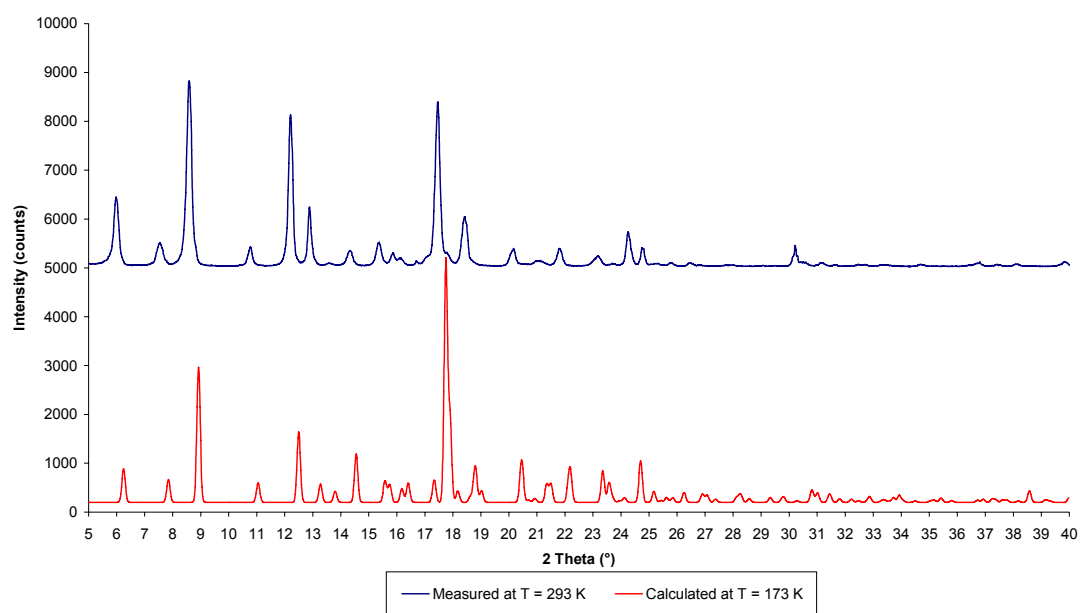

## Ortep Diagrams of Adamantane Carboxylate Anion Disorder

### Salt 7: Anion 1

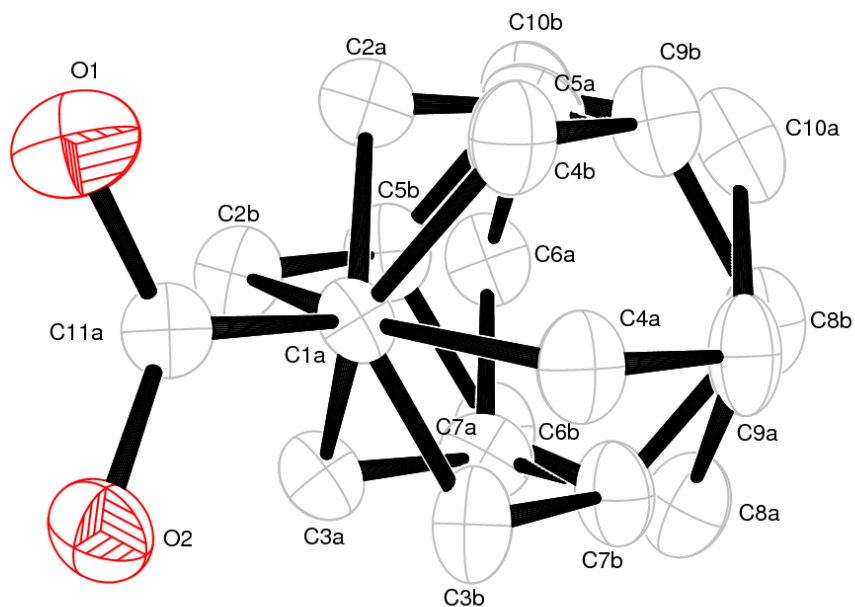

### Salt 7: Anion 2

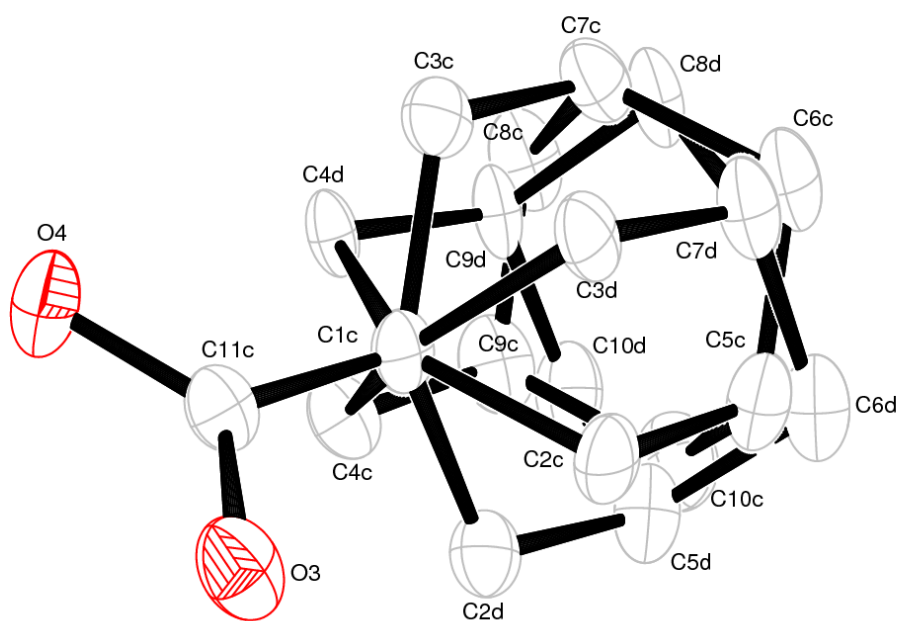

Salt 10:

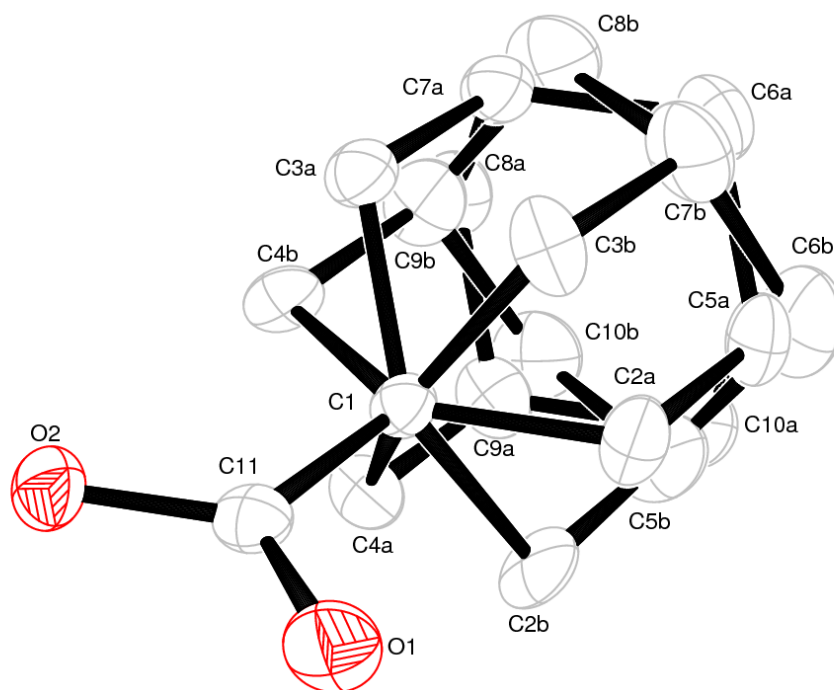

Supplement: c0ce00749h.pdf [file c0ce00749h.pdf]
